# Supplementary material for: ChemFET sensor: Repercussion of Swift Heavy Ion irradiation on nanorods of nickel-based (NRs-Ni3HHTP2) Metal-Organic framework
Source: Research Square preprint supplement (doi:10.21203/rs.3.rs-244931/v1), 2021-02-25
Supplement: Supplementary file 1 [file 868ff62b3508c553354388cc.docx]

**Supporting information**

**The repercussion of Swift Heavy Ion irradiation on nanorods of nickel-based (NRs-Ni3HHTP2) Metal-Organic framework field-effect transistor device**

Nikesh N. Ingle1#, Pasha Sayyad1#, Gajanan Bodkhe1, Harshada Patil1, Megha Deshmukh1, Manasi Mahadik1, Sumedh Shirsat2, Fouran Singh3 and Mahendra Shirsat*1

1RUSA Centre for Advanced Sensor Technology, Department of Physics, Dr. Babasaheb Ambedkar Marathwada University, Aurangabad (MS) – 431004 India

2Department of Electronics & Telecommunication Engineering, Jawaharlal Nehru Engineering College, Aurangabad (MS) – 431 001, India

3Inter University Accelerator Centre (IUAC), New Delhi - 110 067

Corresponding Author E-mail: mdshirsat@gmail.com

**Note: #Both authors have contributed equally**


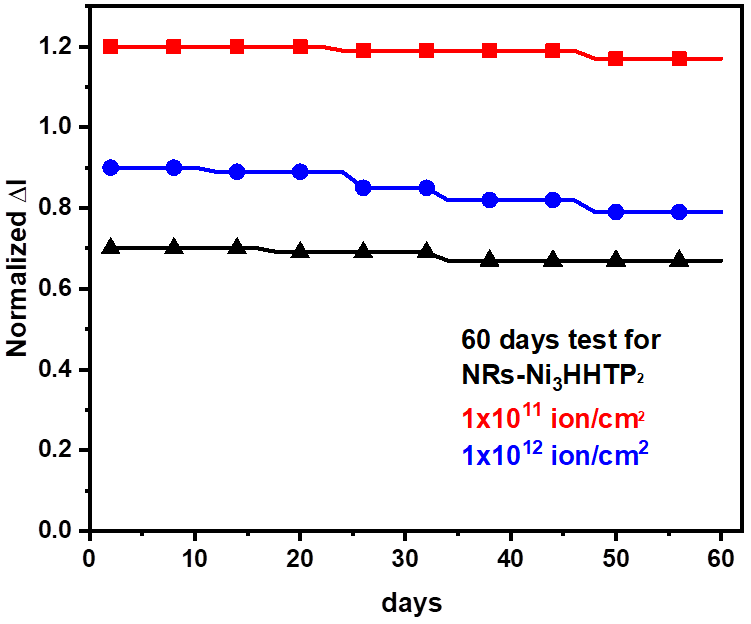


Figure S1: long term (60 days) stability for pristine NRs-Ni3HHTP2 and C+12 ion irradiation with fluence 1x1011 ion/cm2 and 1x1012 ion/cm2 materials.
